# Supplementary material
Source: publisher figshare collection journal article supplement (https://frontiersin.figshare.com/ndownloader/files/12800123)
Supplement: Supplementary file [file 12800123]

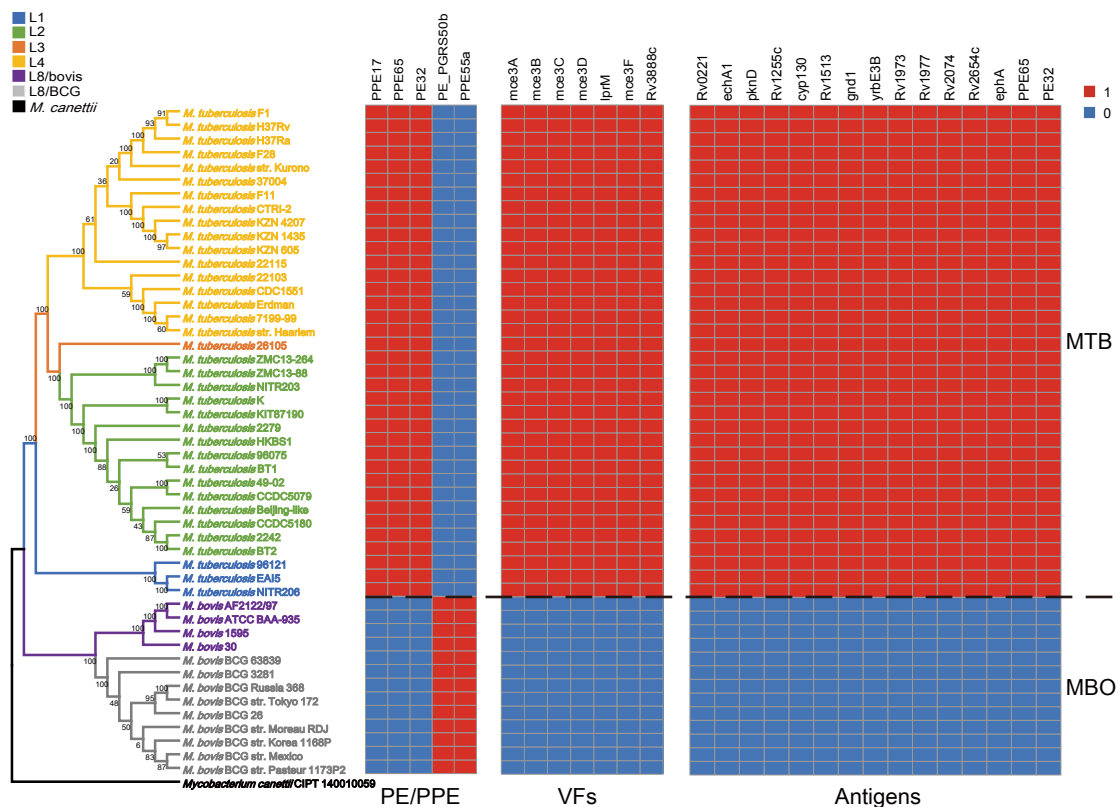

**Supplementary Figure S9.** Mtb and Mbo specific single-copy core PE/PPE, virulence, and antigen genes. The schematic diagram shows the 23 Mtb and two Mbo specific single-copy core PE/PPE, virulence, and antigen genes. Rows represent the 36 Mtb and 13 Mbo strains; columns represent the Mtb and Mbo specific single-copy core PE/PPE, virulence, and antigen genes.
